# Supplementary material for: Potentiometry in aqueous solutions using zeolite filmsElectronic supplementary information (ESI) available: Additional figures. See http://www.rsc.org/suppdata/an/b3/b311868a/
Source: Royal Society of Chemistry journal article supplement (doi:10.1039/b311868a), 2004-01-01
Supplement: b311868a.pdf [file b311868a.pdf]

Supp Inf. Fig. 1. Plot of potential,  $E$ , in terms of equation 1 (where activity is approximated by concentration), recorded after 1 hour for the healed membranes exposed to various concentrations ( $c_2$ ) of  $\text{CaCl}_2$  solutions where  $c_1$  was held constant at 0.1 M.

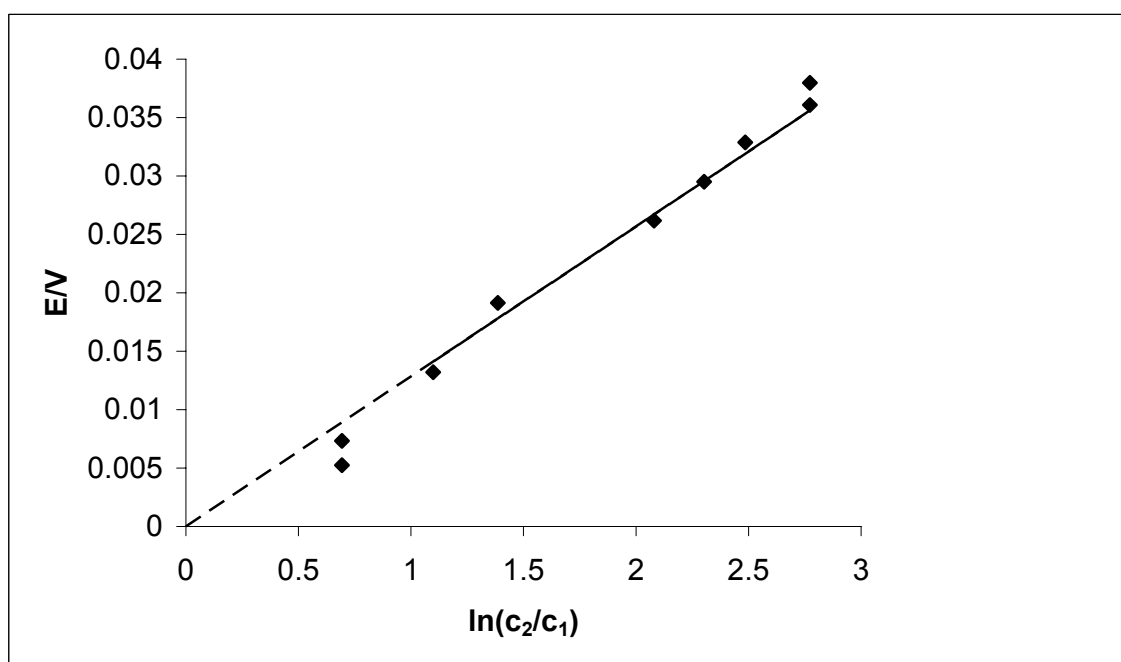

Supp Inf. Fig. 2. Chronopotentiometry of the (a) grown sodalite membranes and (b) zeolite A membranes, formed by the secondary growth step. Both membranes were used with an NaCl reference solution of 0.1 M and an upper solution concentration of (a) 0.6 M and (b) 0.3 M.

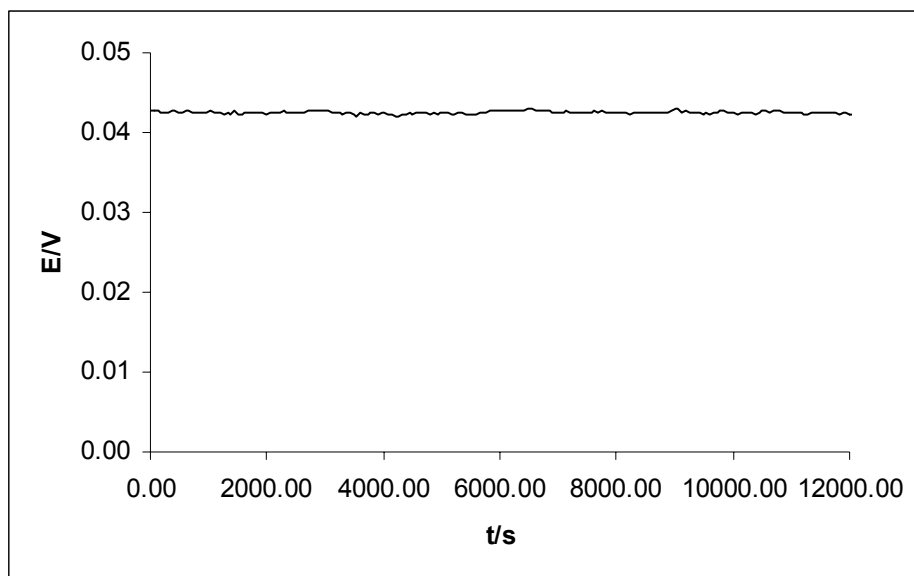

(a)

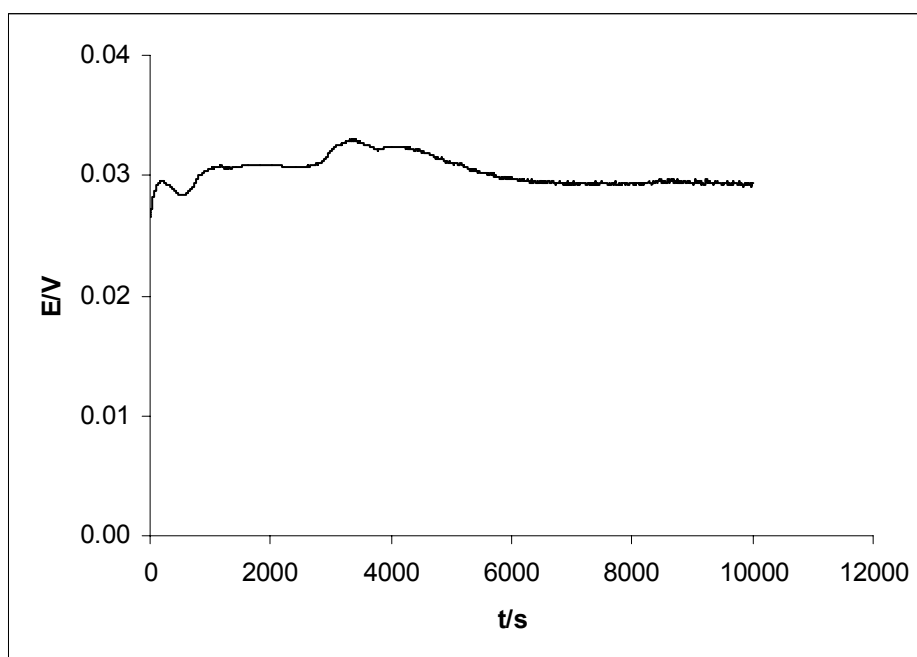

(b)
